# Supplementary material for: Manipulating catalytic activity and durability of Pt-modified Cu–Fe–La/γ-Al2O3 ternary catalyst for catalytic wet air oxidation: effect of calcination temperature
Source: Royal Society of Chemistry journal article supplement (doi:10.1039/c7ra11899f), 2018-01-01
Supplement: c7ra11899f1.pdf [file c7ra11899f1.pdf]

## Supporting Material

### **Manipulating catalytic activity and durability of Pt-modified Cu–Fe–La/ $\gamma$ -Al<sub>2</sub>O<sub>3</sub> ternary catalyst for catalytic wet air oxidation: Effect of calcination temperature**

Yongli Zhang\*, Yanbo Zhou, Chao Peng, Junjun Shi, Qingyu Wang, Lingfeng He,

Liang Shi

*School of Environment and Chemical Engineering, Foshan University, Foshan,*

*Guangdong, 528000, China*

\*Corresponding author: *E-mail:* yongli1929@fosu.edu.cn (Y Zhang), Tel/Fax: +86-

757-82781287.

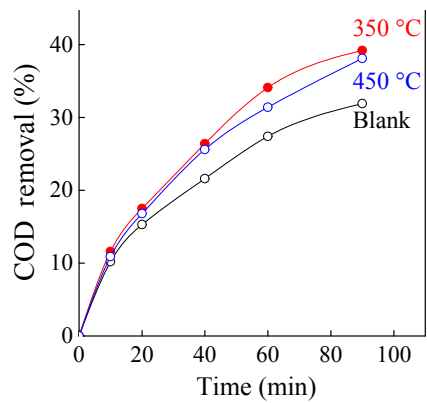

**Fig. S1** influence of calcination temperature on the COD removal efficiency of catalysts.

**Table S1** Pore structure of Pt<sub>1</sub>Cu<sub>1</sub>Fe<sub>1</sub>La<sub>3</sub>/γ-Al<sub>2</sub>O<sub>3</sub> catalysts calcined at different temperatures

| Calcined Temperature<br>s (°C) | $S_{\text{BET}}$<br>(m <sup>2</sup> ·g <sup>-1</sup> ) | $V_{\text{p}}$<br>(cm <sup>3</sup> ·g <sup>-1</sup> ) | $D_{\text{p}}$<br>(nm) |
|--------------------------------|--------------------------------------------------------|-------------------------------------------------------|------------------------|
| 350                            | 273.6                                                  | 0.52                                                  | 8.2                    |
| 450                            | 270.4                                                  | 0.51                                                  | 7.6                    |
| 550                            | 252.3                                                  | 0.51                                                  | 8.3                    |
| 650                            | 242.5                                                  | 0.50                                                  | 8.6                    |
| 750                            | 196.8                                                  | 0.49                                                  | 8.7                    |

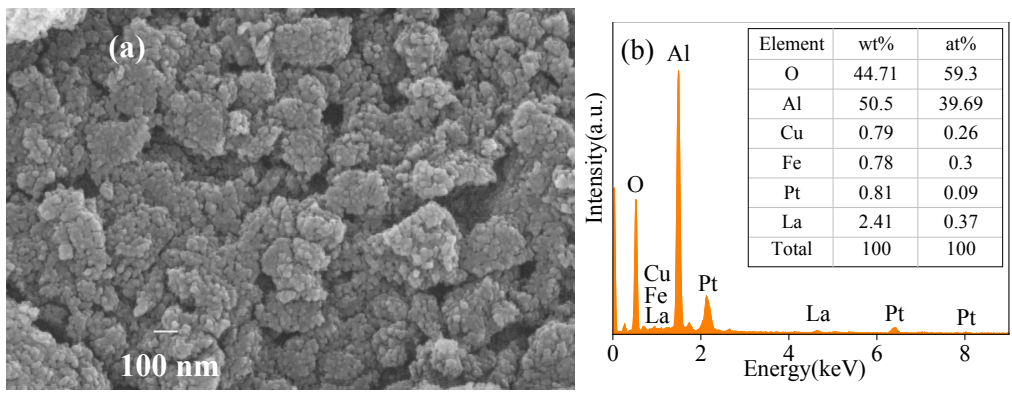

**Fig. S2** FESEM-EDS of  $\text{Pt}_1\text{Cu}_1\text{Fe}_1\text{La}_3/\gamma\text{-Al}_2\text{O}_3$  catalyst calcined  $650\text{ }^\circ\text{C}$ : (a) FESEM image, (b) EDS spectrum.

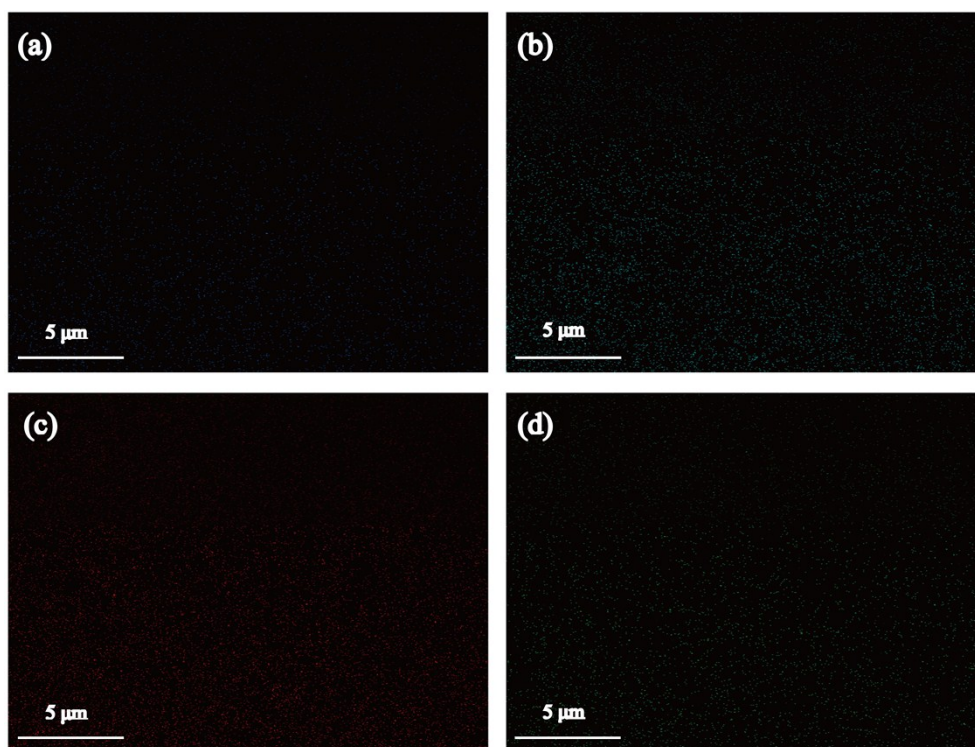

**Fig. S3** FESEM-EDS elemental maps of  $\text{Pt}_1\text{Cu}_1\text{Fe}_1\text{La}_3/\gamma\text{-Al}_2\text{O}_3$  catalyst calcined 650

$^{\circ}\text{C}$ : (a) Cu, (b) Fe, (c) Pt, (d) La.
